# Supplementary material
Source: Springer Nature journal article supplement (https://www.springermedizin.de/resource/supplementary/12875_2014_1181_MOESM3_ESM.pdf/9436056)
Supplement: MOESM3 [file 9436056]

Triage

Management

**Your patient may have suffered from a TIA and the estimated seven day [stroke risk](#) is Low**

You have two management options:

**a) Refer to [TIA Clinic](#) AND (before patient leaves surgery):**

Initiate/continue ALL of the following Medications:

[Clopidogrel](#) OR [Aspirin](#) +/- [Dipyridamole](#) (UNLESS patient is on [Warfarin](#) or [Dabigatran](#))

AND

[Statin](#) AND [Antihypertensive](#)

AND

Counsel patient on [Smoking Cessation](#) AND No [Driving](#) for minimum of 1 month.[Print TIA Information Leaflet](#)

OR

**b) Arrange comprehensive TIA/stroke work-up in the community (see 'Management' tab).**

Clicking or hovering over blue links or an ⓘ opens a pop-up window with added information for the user and/or generates referrals, prescription or patient leaflets

Triage

Management

**ATTENTION:** Please ensure that all referrals and prescriptions are appropriate and correct prior to handing them to the patient - this software is intended as a tool to support, but not replace practitioner clinical judgement.
